# Supplementary material for: Integrative transcriptomic and machine learning analyses identify HDAC9 as a key regulator of mitochondrial dysfunction and senescence-associated inflammation in diabetic nephropathy
Source: Front Immunol. 2025 Aug 29;16:1627173. doi: 10.3389/fimmu.2025.1627173 (PMC12425722; doi:10.3389/fimmu.2025.1627173)
Supplement: Supplementary Table 2 — The antibodies used in the study. [file Table2.xlsx]

## Sheet: Sheet1
Antibodies	Item No.	Manufacturer, address
anti-HDAC9	ab109446	Abcam, Cambridge, UK
anti-P53	10442-1-AP	Proteintech Group, Wuhan, China
anti-P21	10355-1-AP	Proteintech Group, Wuhan, China
anti-P16	10883-1-AP	Proteintech Group, Wuhan, China
anti-β-actin	20536-1-AP	Proteintech Group, Wuhan, China
